# Supplementary material for: Apple and pear consumption and type 2 diabetes mellitus risk: a meta-analysis of prospective cohort studies
Source: Royal Society of Chemistry journal article supplement (doi:10.1039/c6fo01378c), 2017-01-01
Supplement: c6fo01378c2.pdf [file c6fo01378c2.pdf]

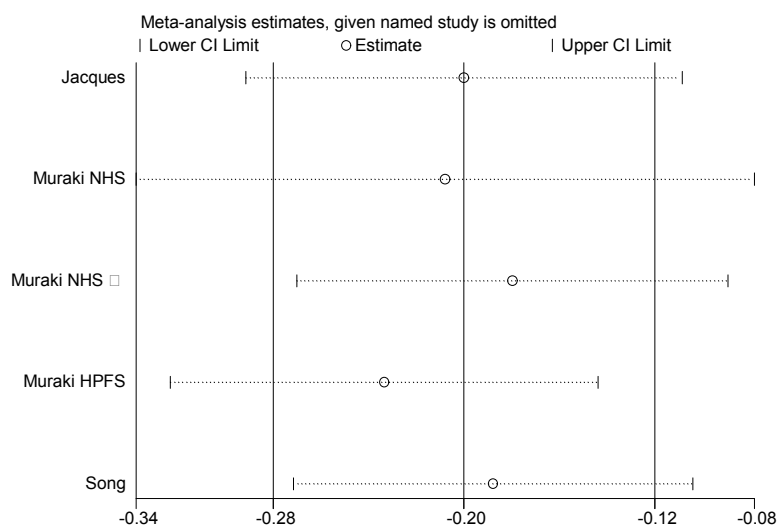

Supplementary Fig. 1. Sensitivity analysis for apple and pear intake associated with T2DM risk, in which the pooled RRs are re-estimated after omitting one study each time. T2DM: type 2 diabetes mellitus; RR, relative risk.

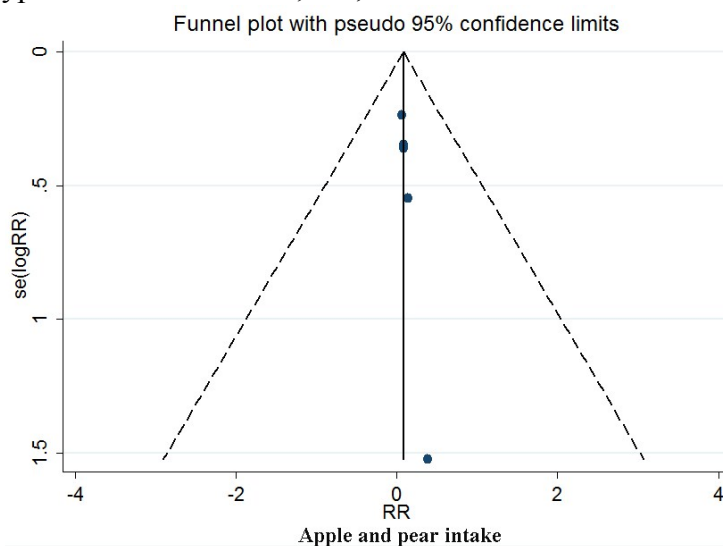

Supplementary Fig. 2. Funnel plot for apple and pear intake associated with T2DM risk. Begg's test ( $p = 1.00$ ) and Egger's test ( $p = 0.69$ )

Supplementary Table 1. Search strategy in Cochrane library, Embase and PubMed databases

|                               |
|-------------------------------|
| 1. fruit                      |
| 2. vegetable                  |
| 3. apple                      |
| 4. pear                       |
| 5. (1 OR 2 OR 3 OR 4 OR 5 OR) |
| 6. type 2 diabetes            |
| 7. 5 and 6                    |
